# Supplementary figures and images for: Epigallocatechin Gallate Remodelling of Hfq Amyloid-Like Region Affects Escherichia coli Survival
Source: MDPI journal article supplement (doi:10.3390/pathogens7040095), 2018-12-01

ITC of CTER11 with ECGC

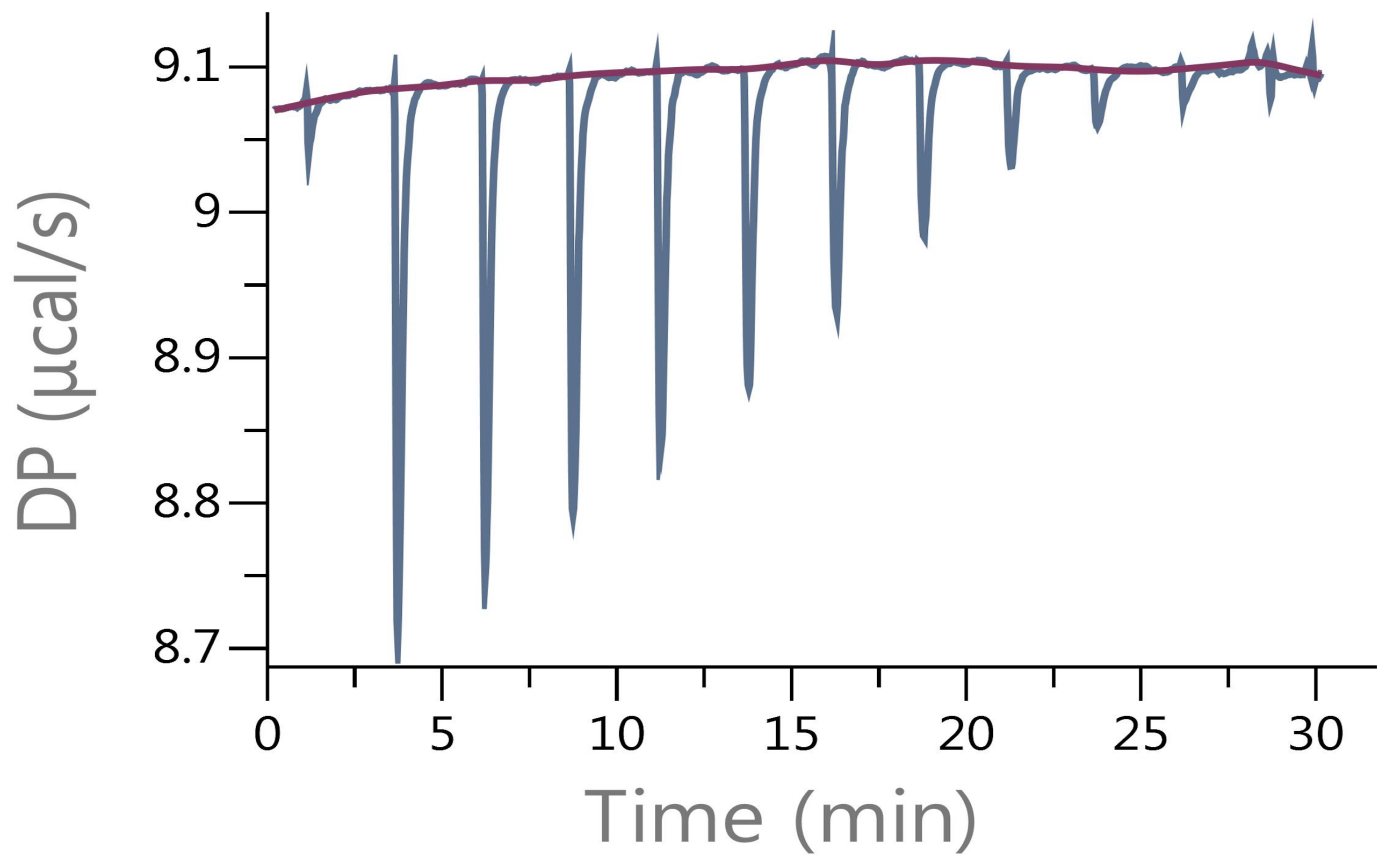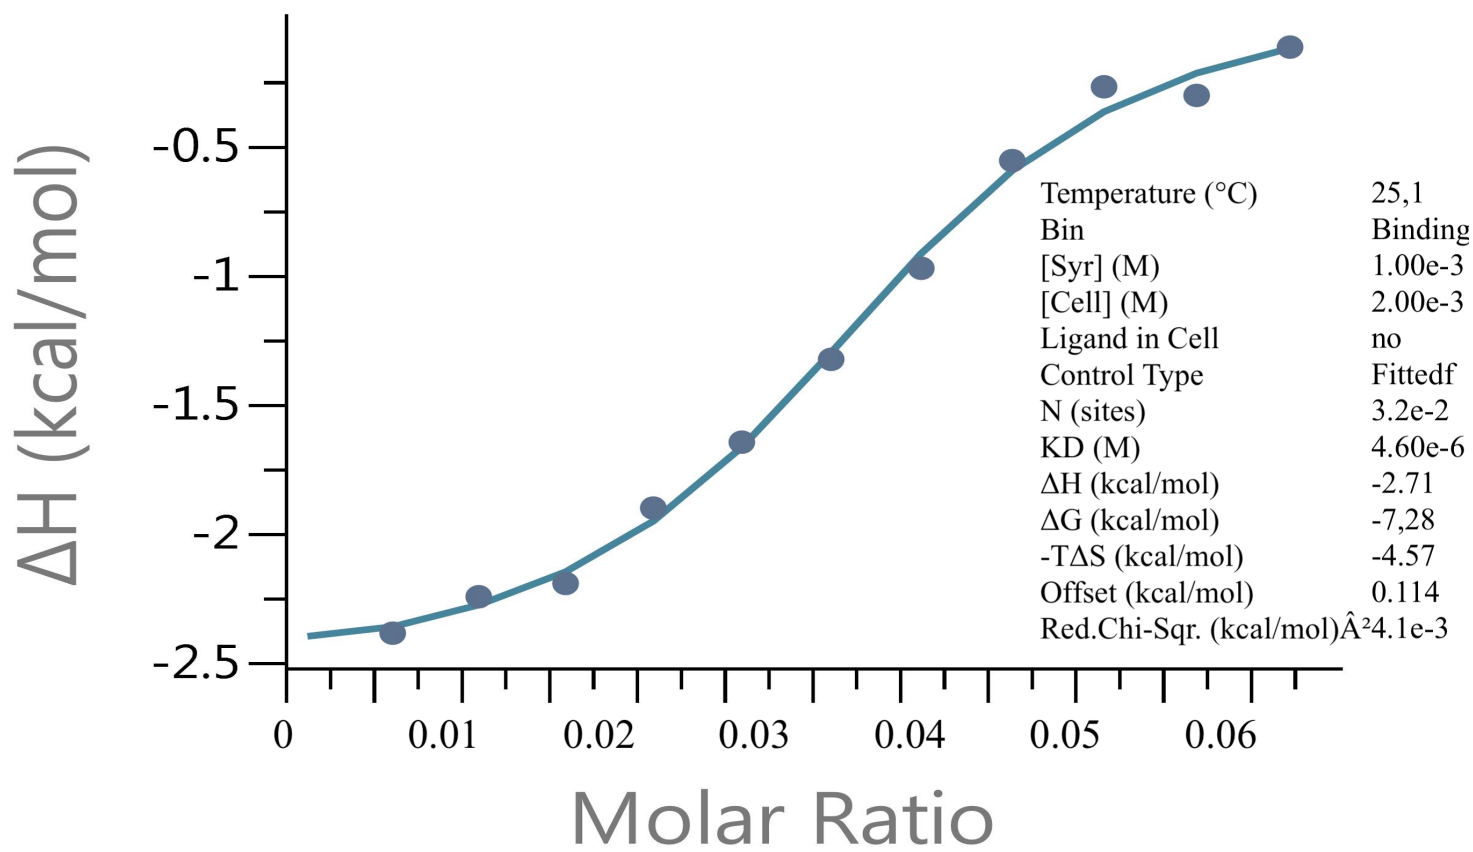

Supplement: s1 [file s1]

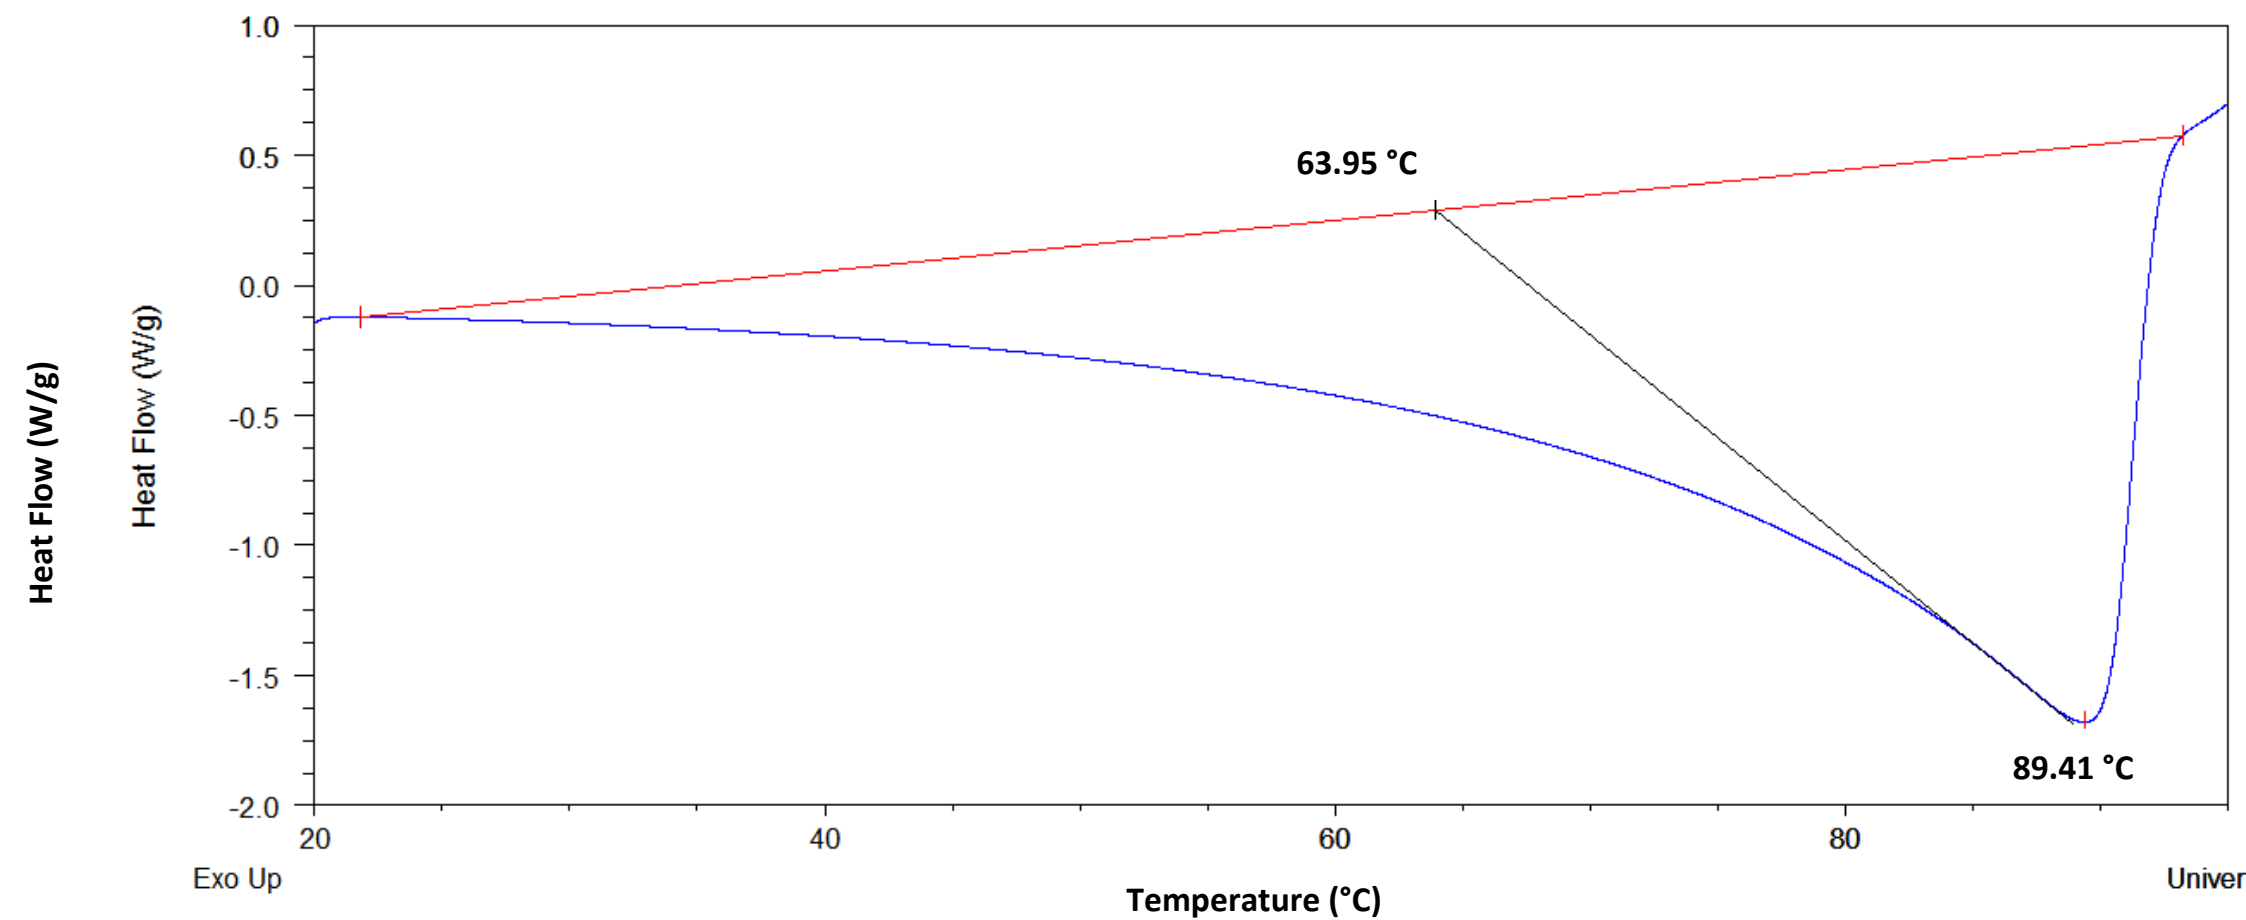

Supplement: s1 [file s1]
